# Supplementary material
Source: publisher site journal article supplement (https://www.dovepress.com/article/supplementary_file/622207/622207%20Revised%20%2509Supplemental%20Data.docx)
Supplement: Supplementary file 1 [file 622207%20Revised%20%2509Supplemental%20Data.docx]

Supplemental Table A.

| Parameter | PCS group | | *P* value | FLACS group | | *P* value |
| --- | --- | --- | --- | --- | --- | --- |
| Pain-free group  (53 eyes) | Pain group  (47 eyes) | Pain-free group  (42 eyes) | Pain group  (58 eyes) |
| Surgery duration, min | 6.36 ± 2.14 | 6.28 ± 1.38 | 0.75 | 5.81 ± 1.44 | 5.71 ± 1.21 | 0.82 |
| Anesthesia duration, min | 12.81 ± 6.12 | 12.43 ± 5.85 | 0.98 | 12.10 ± 3.70 | 12.09 ± 3.70 | 0.98 |
| Age, years (SD) | 67.74 ± 8.69 | 65.68 ± 9.01 | 0.25 | 68.26 ± 9.24 | 63.67 ± 11.92 | 0.04* |
| Sex, n (%) |  |  | 0.19 |  |  | 0.47 |
| Male | 22 (41.51) | 12 (25.53) |  | 18 (42.86) | 20 (34.48) |  |
| Female | 31 (58.49) | 35 (74.47) |  | 24 (57.14) | 38 (65.52) |  |
| Side, n (%) |  |  | 0.26 |  |  | 0.10 |
| Right | 33 (62.26) | 24 (51.06) |  | 19 (45.24) | 36 (62.07) |  |
| Left | 20 (37.74) | 23 (48.94) |  | 23 (54.76) | 22 (37.93) |  |
| Education, n (%) |  |  | 0.87 |  |  | 0.92 |
| Illiterate | 21 (39.62) | 21 (44.68) |  | 10 (23.81) | 15 (25.86) |  |
| Primary | 12 (22.64) | 10 (21.28) |  | 10 (23.81) | 10 (17.24) |  |
| Secondary | 20 (37.74) | 16 (34.04) |  | 20 (47.62) | 30 (51.72) |  |
| High | - | - |  | 2 (4.76) | 3 (5.17) |  |
| Systemic disease, n (%) |  |  | 0.51 |  |  | 0.21 |
| None | 17 (32.08) | 17 (36.17) |  | 17 (40.48) | 34 (58.62) |  |
| HTN alone | 22 (41.51) | 13 (27.66) |  | 17 (40.48) | 13 (22.41) |  |
| DM alone | 8 (15.09) | 9 (19.15) |  | 2 (4.76) | 2 (3.45) |  |
| HTN+DM | 6 (11.32) | 8 (17.02) |  | 6 (14.29) | 9 (15.52) |  |
| Ocular disease, n (%) |  |  |  |  |  |  |
| Glaucoma | 1 (1.89) | 1 (2.13) | 1.00 | 4 (9.52) | 1 (1.72) | 0.16 |
| Dry eye | 13 (24.53) | 13 (27.66) | 0.72 | 19 (45.24) | 22 (37.93) | 0.46 |
| Pterygium | 5 (9.43) | 3 (6.38) | 0.72 | 2 (4.76) | 2 (3.45) | 1.00 |
| Diabetic retinopathy | 2 (3.77) | 4 (8.51) | 0.42 | 0 (0.00) | 2 (3.45) | 0.51 |
| Macular membrane | 1 (1.89) | 4 (8.51) | 0.18 | 0 (0.00) | 0 (0.00) | 1.00 |
| Retinitis pigmentosa | 0 (0.00) | 1 (2.13) | 0.47 | 0 (0.00) | 2 (3.45) | 0.51 |
| Second eye operation†, n (%) | 33 (62.26) | 24 (51.06) | 0.26 | 23 (54.76) | 25 (43.10) | 0.25 |
| NS grade, mean (SD) |  |  | 0.14 |  |  | 0.17 |
| II | 13 (24.53) | 20 (42.55) |  | 12 (28.57) | 25 (43.10) |  |
| III | 35(66.04) | 25 (53.19) |  | 22 (52.38) | 28 (48.28) |  |
| IV | 5 (9.43) | 2 (4.26) |  | 8 (19.05) | 5 (8.62) |  |
| Preoperative IOP, mmHg | 14.06 ± 2.95 | 13.22 ± 2.91 | 0.18 | 14.24 ± 3.56 | 13.70 ± 3.12 | 0.39 |
| Preoperative CDVA, logMAR | 0.51 ± 0.48 | 0.44 ± 0.31 | 0.97 | 0.45 ± 0.41 | 0.42 ± 0.47 | 0.33 |
| AL, mm | 23.33 ± 0.87 | 23.09 ± 0.81 | 0.26 | 23.50 ± 1.07 | 23.67 ± 1.03 | 0.43 |
| ACD, mm | 2.98 ± 0.38 | 2.94 ± 0.37 | 0.63 | 2.95 ± 0.38 | 2.98 ± 0.37 | 0.68 |
| LT, mm | 4.53 ± 0.48 | 4.51 ± 0.46 | 0.83 | 4.69 ± 0.43 | 4.54 ± 0.41 | 0.07 |
| Km, D | 44.10 ± 1.33 | 44.32 ± 1.52 | 0.44 | 44.45 ± 1.46 | 43.91 ± 1.67 | 0.09 |
| CD, mm | 11.72 ± 0.36 | 11.72 ± 0.40 | 0.88 | 11.75 ± 0.44 | 11.83 ± 0.41 | 0.37 |
| CCT, μm | 540.36 ± 31.26 | 531.37 ± 82.44 | 0.95 | 541.48 ± 31.08 | 547.88 ± 33.80 | 0.34 |
| ECD, cells/mm2 | 2631.40 ± 318.86 | 2698.11 ± 282.26 | 0.28 | 2659.33 ± 227.31 | 2719.09 ± 277.59 | 0.26 |
| IOL power, D | 20.76 ± 2.26 | 21.18 ± 2.17 | 0.34 | 19.93 ± 2.90 | 20.02 ± 3.26 | 0.99 |

PCS = phacoemulsification cataract surgery; FLACS = femtosecond laser-assisted cataract surgery.

ACD = anterior chamber depth; AL = axial length; CD = horizontal corneal diameter; CDVA = corrected distance visual acuity; CCT = central corneal thickness; D = diopter; DM = diabetes mellitus; ECD = endothelial cell density; HTN = hypertension; IOL = intraocular lens; IOP = intraocular pressure; Km = corneal keratometry; logMAR = logarithm of the minimum angle resolution; LT = lens thickness; NS = nuclear sclerosis.

*Statistically significant (*P* < 0.05).

† Second eye operation: The current surgery was the second eye cataract operation.

Supplemental Table B. Multivariable linear regression analysis for VAS scores.

| Variable | β coefficient | 95% CI | Std. Error | *P* value | VIF |
| --- | --- | --- | --- | --- | --- |
| FLACS vs. PCS | 0.334 | −0.115 to 0.782 | 0.227 | **0.144** | 1.431 |
| Age | −0.002 | −0.025 to 0.022 | 0.012 | 0.888 | 1.533 |
| Sex | −0.157 | −0.679 to 0.365 | 0.264 | 0.553 | 1.371 |
| Side | −0.014 | −0.402 to 0.375 | 0.197 | 0.944 | 1.057 |
| Education | −0.002 | −0.255 to 0.251 | 0.128 | 0.988 | 1.531 |
| Systemic disease | −0.097 | −0.521 to 0.326 | 0.215 | 0.652 | 1.246 |
| Ocular disease | −0.138 | −0.572 to 0.296 | 0.220 | 0.532 | 1.195 |
| Second eye operation† | −0.090 | −0.482 to 0.303 | 0.199 | 0.653 | 1.090 |
| NS grade | −0.090 | −0.452 to 0.272 | 0.183 | 0.623 | 1.444 |
| Preoperative IOP | −0.004 | −0.069 to 0.062 | 0.033 | 0.914 | 1.188 |
| Preoperative CDVA | 0.115 | −0.689 to 0.919 | 0.407 | 0.778 | 1.490 |
| AL | 0.027 | −0.259 to 0.312 | 0.145 | 0.854 | 2.158 |
| ACD | −0.374 | −1.270 to 0.529 | 0.458 | 0.415 | 3.188 |
| LT | −0.301 | −0.969 to 0.367 | 0.339 | 0.375 | 2.532 |
| Km | 0.034 | −0.135 to 0.203 | 0.085 | 0.693 | 1.830 |
| CD | 0.170 | −0.451 to 0.792 | 0.315 | 0.590 | 1.763 |
| CCT | −0.002 | −0.008 to 0.005 | 0.003 | 0.597 | 1.261 |
| ECD | 0.000 | −0.001 to 0.001 | 0.000 | 0.542 | 1.184 |

PCS = phacoemulsification cataract surgery; FLACS = femtosecond laser-assisted cataract surgery.

ACD = anterior chamber depth; AL = axial length; CD = horizontal corneal diameter; CDVA = corrected distance visual acuity; CCT = central corneal thickness; ECD = endothelial cell density; IOP = intraocular pressure; Km = corneal keratometry; LT = lens thickness; NS = nuclear sclerosis.

† Second eye operation: The current surgery was the second eye cataract operation.

Supplemental Table C. Linear mixed-effects model for VAS scores (random intercept by patient).

| Fixed effect | Estimate | Std. Error | df | t | *P* value | 95% CI |
| --- | --- | --- | --- | --- | --- | --- |
| FLACS vs. PCS | −0.043 | 0.208 | 178 | −0.209 | 0.835 | −0.453 to 0.367 |
| Age | 0.005 | 0.011 | 178 | 0.443 | 0.659 | −0.016 to 0.026 |
| Sex | 0.005 | 0.242 | 178 | 0.021 | 0.983 | −0.473 to 0.483 |
| Side | −0.034 | 0.181 | 178 | −0.189 | 0.850 | −0.391 to 0.323 |
| Education level | —* | — | — | — | 0.974†† | — |
| Systemic disease | −0.167 | 0.194 | 178 | −0.860 | 0.391 | −0.550 to 0.216 |
| Ocular disease | −0.075 | 0.200 | 178 | −0.375 | 0.708 | −0.469 to 0.319 |
| Second eye operation† | 0.209 | 0.180 | 178 | 1.163 | 0.247 | −0.146 to 0.565 |
| NS grade | —* | — | — | — | 0.574†† | — |
| Preoperative IOP | −0.045 | 0.030 | 178 | −1.498 | 0.136 | −0.105 to 0.014 |
| Preoperative CDVA | 0.063 | 0.368 | 178 | 0.171 | 0.864 | −0.663 to 0.789 |
| AL | 0.013 | 0.131 | 178 | 0.096 | 0.923 | −0.245 to 0.271 |
| ACD | −0.120 | 0.414 | 178 | −0.289 | 0.773 | −0.938 to 0.698 |
| LT | 0.166 | 0.308 | 178 | 0.539 | 0.591 | −0.441 to 0.773 |
| Km | −0.022 | 0.077 | 178 | −0.284 | 0.777 | −0.175 to 0.131 |
| CD | −0.406 | 0.285 | 178 | −1.427 | 0.155 | −0.969 to 0.156 |
| CCT | 0.000 | 0.003 | 178 | 0.016 | 0.987 | −0.006 to 0.006 |
| ECD | 0.000 | 0.000 | 178 | 0.188 | 0.851 | −0.001 to 0.001 |

PCS = phacoemulsification cataract surgery; FLACS = femtosecond laser-assisted cataract surgery.

ACD = anterior chamber depth; AL = axial length; CD = horizontal corneal diameter; CDVA = corrected distance visual acuity; CCT = central corneal thickness; ECD = endothelial cell density; IOP = intraocular pressure; Km = corneal keratometry; LT = lens thickness; NS = nuclear sclerosis.

†Second eye operation: The current surgery was the second eye cataract operation; *Estimates for individual levels of categorical variables not shown; ††Type III tests of fixed effects.
